# Supplementary material
Source: PubMed Central journal article supplement (PMC6997029)
Supplement: EMS85609-supplement-Supplementary_table_1.pdf [file EMS85609-supplement-Supplementary_table_1.pdf]

| Description                   | Sequence (5' to 3')   |
|-------------------------------|-----------------------|
| <i>T. gondii</i> UPRT Forward | CCCGATATTCGACAAACGAC  |
| <i>T. gondii</i> UPRT Reverse | GCTTCATGAGCACCCACATTG |
| HPRT Forward                  | GCCTAAGATGAGCGCAAGTTG |
| HPRT Reverse                  | TACTAGGCAGATGGCCACAGG |
